# Supplementary material for: Remodeling of Tight Junctions and Enhancement of Barrier Integrity of the CACO-2 Intestinal Epithelial Cell Layer by Micronutrients
Source: PLOS journal article supplement (doi:10.1371/journal.pone.0133926), 2015-07-30
Supplement: S2 (10.1371/journal.pone.0133926.s002) [file journal.pone.0133926.s002]

B

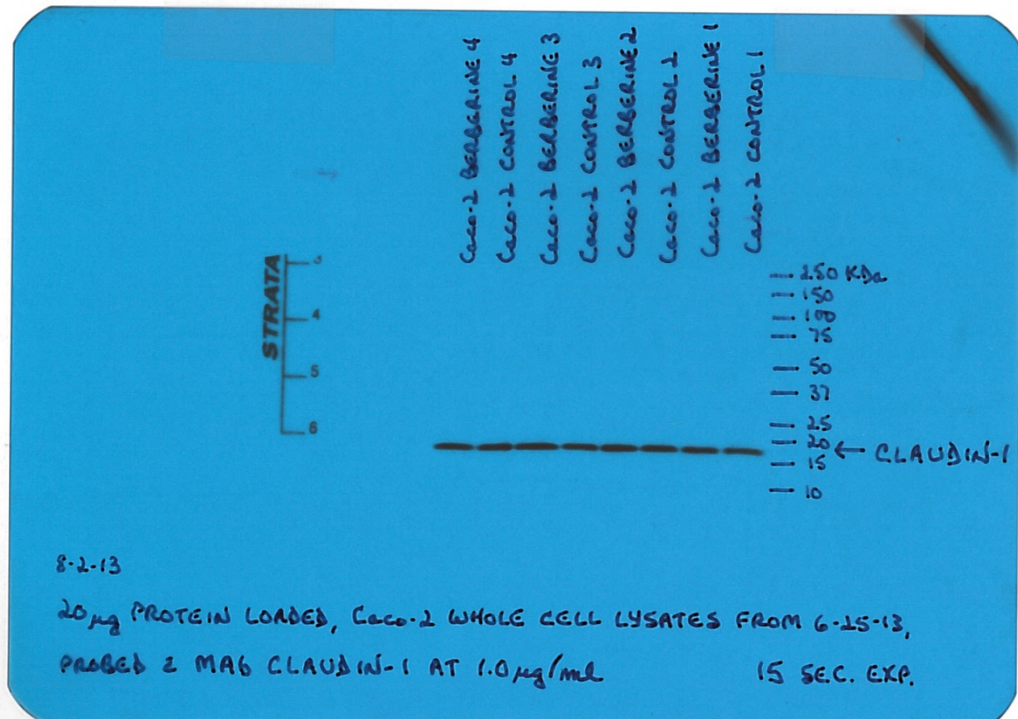

Effect of Berberine on Claudin-1 in CACO-2 Cell Layers
